# Supplementary material for: Virtual Reality-Based Interventions to Improve Balance in Patients with Traumatic Brain Injury: A Scoping Review
Source: MDPI journal article supplement (doi:10.3390/brainsci14050429), 2024-04-26
Supplement: s1 [file s1]

Detailed PEDro scale rating for selected studies.

| Sr. No | Date Published | Eligibility criteria were specified (This question is not considered for total score) | Subjects were randomly allocated to groups | Allocation was concealed | The groups were similar at baseline regarding the most important prognostic indicators | There was blinding of all subjects | There was blinding of all therapists who administered the therapy | There was blinding of all assessors who measured at least one key outcome | Measures of at least one key outcome were obtained from more than 85% of the subjects initially allocated to groups | At least one key outcome was analysed by "intention to treat" | Between-group statistical comparisons are reported for at least one key outcome | Point measures and measures of variability for at least one key outcome | Total score |
|--------|----------------|---------------------------------------------------------------------------------------|--------------------------------------------|--------------------------|----------------------------------------------------------------------------------------|------------------------------------|-------------------------------------------------------------------|---------------------------------------------------------------------------|---------------------------------------------------------------------------------------------------------------------|---------------------------------------------------------------|---------------------------------------------------------------------------------|-------------------------------------------------------------------------|-------------|
| [24]   | 2022           | Y                                                                                     | Y                                          | Y                        | Y                                                                                      | N                                  | N                                                                 | Y                                                                         | Y                                                                                                                   | Y                                                             | Y                                                                               | Y                                                                       | 8           |
| [25]   | 2019           | Y                                                                                     | Y                                          | Y                        | Y                                                                                      | N                                  | N                                                                 | Y                                                                         | Y                                                                                                                   | Y                                                             | Y                                                                               | Y                                                                       | 8           |
| [26]   | 2017           | Y                                                                                     | Y                                          | Y                        | Y                                                                                      | N                                  | N                                                                 | N                                                                         | Y                                                                                                                   | Y                                                             | Y                                                                               | Y                                                                       | 7           |
| [27]   | 2019           | Y                                                                                     | N                                          | N                        | Y                                                                                      | N                                  | N                                                                 | N                                                                         | Y                                                                                                                   | N                                                             | N                                                                               | Y                                                                       | 3           |
| [28]   | 2019           | Y                                                                                     | N                                          | N                        | N                                                                                      | N                                  | N                                                                 | N                                                                         | Y                                                                                                                   | N                                                             | Y                                                                               | Y                                                                       | 3           |
| [29]   | 2022           | Y                                                                                     | N                                          | N                        | Y                                                                                      | N                                  | N                                                                 | N                                                                         | Y                                                                                                                   | Y                                                             | Y                                                                               | Y                                                                       | 5           |
| [30]   | 2017           | Y                                                                                     | N                                          | N                        | N                                                                                      | N                                  | Y                                                                 | N                                                                         | Y                                                                                                                   | Y                                                             | N                                                                               | Y                                                                       | 4           |
| [31]   | 2023           | N                                                                                     | N                                          | N                        | N                                                                                      | N                                  | N                                                                 | N                                                                         | Y                                                                                                                   | Y                                                             | N                                                                               | Y                                                                       | 3           |
| [32]   | 2022           | N                                                                                     | N                                          | N                        | N                                                                                      | N                                  | N                                                                 | N                                                                         | N                                                                                                                   | Y                                                             | Y                                                                               | Y                                                                       | 3           |
| [33]   | 2018           | Y                                                                                     | N                                          | N                        | N                                                                                      | N                                  | N                                                                 | N                                                                         | Y                                                                                                                   | N                                                             | Y                                                                               | Y                                                                       | 3           |
| [34]   | 2020           | Y                                                                                     | N                                          | N                        | Y                                                                                      | N                                  | N                                                                 | N                                                                         | Y                                                                                                                   | Y                                                             | Y                                                                               | Y                                                                       | 5           |

Detailed PEDro scale rating for selected studies.

|      |      |   |   |   |   |   |   |   |   |   |   |   |   |
|------|------|---|---|---|---|---|---|---|---|---|---|---|---|
| [35] | 2016 | Y | N | N | Y | N | N | N | Y | Y | Y | Y | 5 |
| [36] | 2016 | Y | N | N | Y | N | N | N | Y | Y | Y | N | 4 |
| [37] | 2017 | Y | N | N | N | N | N | N | Y | Y | Y | Y | 4 |
| [38] | 2022 | Y | N | N | Y | N | N | N | Y | Y | Y | Y | 5 |
| [39] | 2017 | Y | N | N | N | N | N | Y | Y | Y | Y | Y | 5 |
| [40] | 2022 | N | N | N | N | N | N | N | Y | Y | Y | Y | 4 |

\*\*Y=Yes; N=No
